# Supplementary material for: Founder effect in the Horn of Africa for an insulin receptor mutation that may impair receptor recycling
Source: Springer Nature journal article supplement (doi:10.1007/s00125-011-2066-z), 2011-02-11
Supplement: MOESM2 [file 8089838]

## Electronic supplementary material

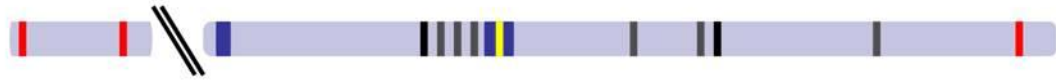

**ESM Fig. 1** Schematic map of the relevant region of the *INSR* gene. Introns are shown in grey, and exons 1 and 2 (left and right, respectively) in blue. Genotyped markers are as follows: red if alleles not shared, grey if all alleles identical, black if genotype homozygous in Patient (P) 2, P3 and P4 and heterozygous in P5. Ile119Met is shown in yellow. Markers shown are (left to right): D19S916, D19S873, unannotated microsatellite in intron 1, rs7254487, rs62109585, rs7248939, rs11671297, rs4804433, rs3852876, rs57930737, rs4499341
